# Supplementary material for: A facile “off–on” pattern based on one-pot synthesis of N-doped carbon dots for sensitive detection of Ag+and S2O32−
Source: Royal Society of Chemistry journal article supplement (doi:10.1039/d2nj00919f), 2022-01-01
Supplement: d2nj00919f1.pdf [file d2nj00919f1.pdf]

---

**Supporting information for**

**A facile “off-on” pattern based on one-pot synthesis of N doped  
carbon dots for sensitive detection of Ag<sup>+</sup> and S<sub>2</sub>O<sub>3</sub><sup>2-</sup>**

Qinqin Chen, Huiling Liu, Na Niu\*, Wei Feng\* and Juan Hou\*

*Department of Chemistry, Chemical Engineering and Resource Utilization, Northeast Forestry  
University, 26 Hexing Road, Harbin 150040, PR China*

\*Corresponding author

E-mail: [houjuan0503@126.com](mailto:houjuan0503@126.com) (J. Hou); [wfeng@nefu.edu.cn](mailto:wfeng@nefu.edu.cn) (W. Feng); [niuna@nefu.edu.cn](mailto:niuna@nefu.edu.cn) (N. Niu)

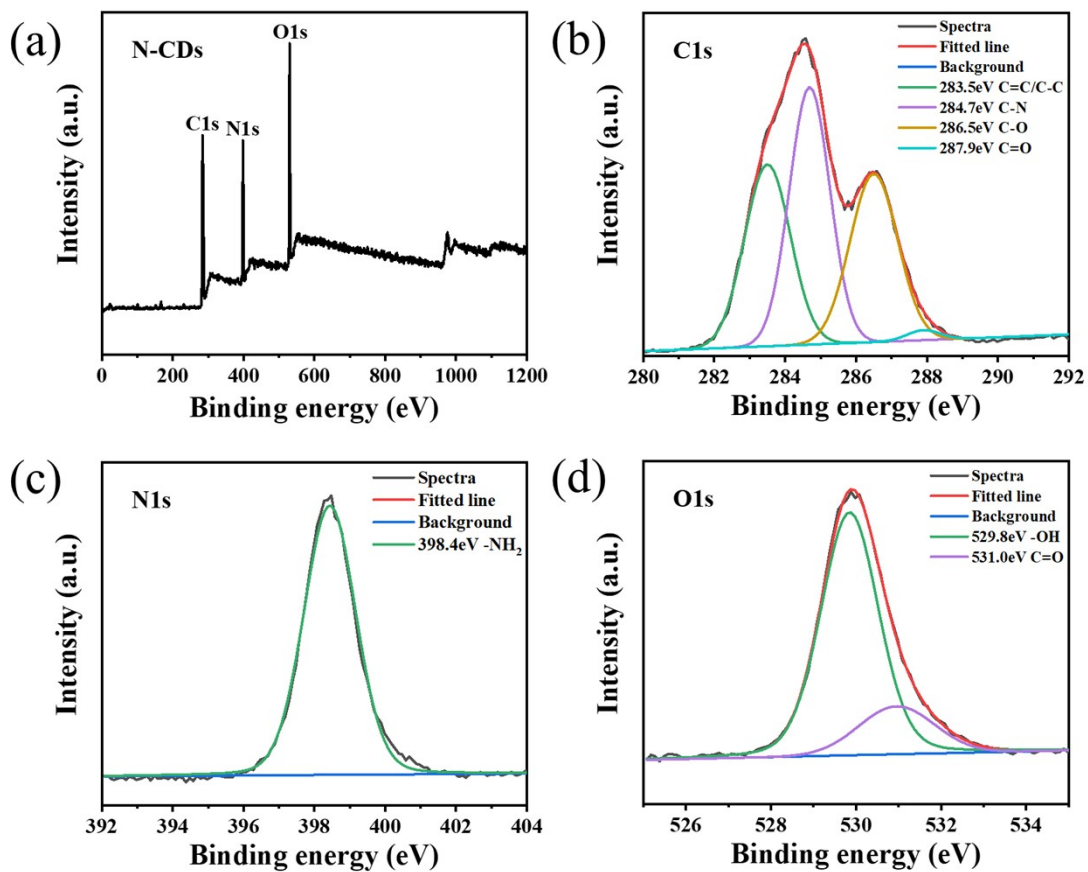

**Fig. S1** (a) Total XPS, (b) C1s, (c) N1s, (d) O1s XPS spectrum.

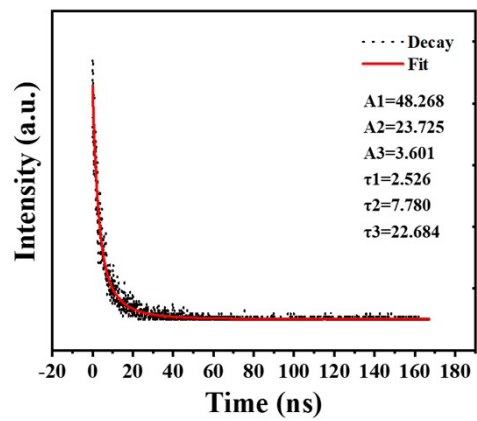

**Fig. S2** FL lifetime curves of N-CDs.

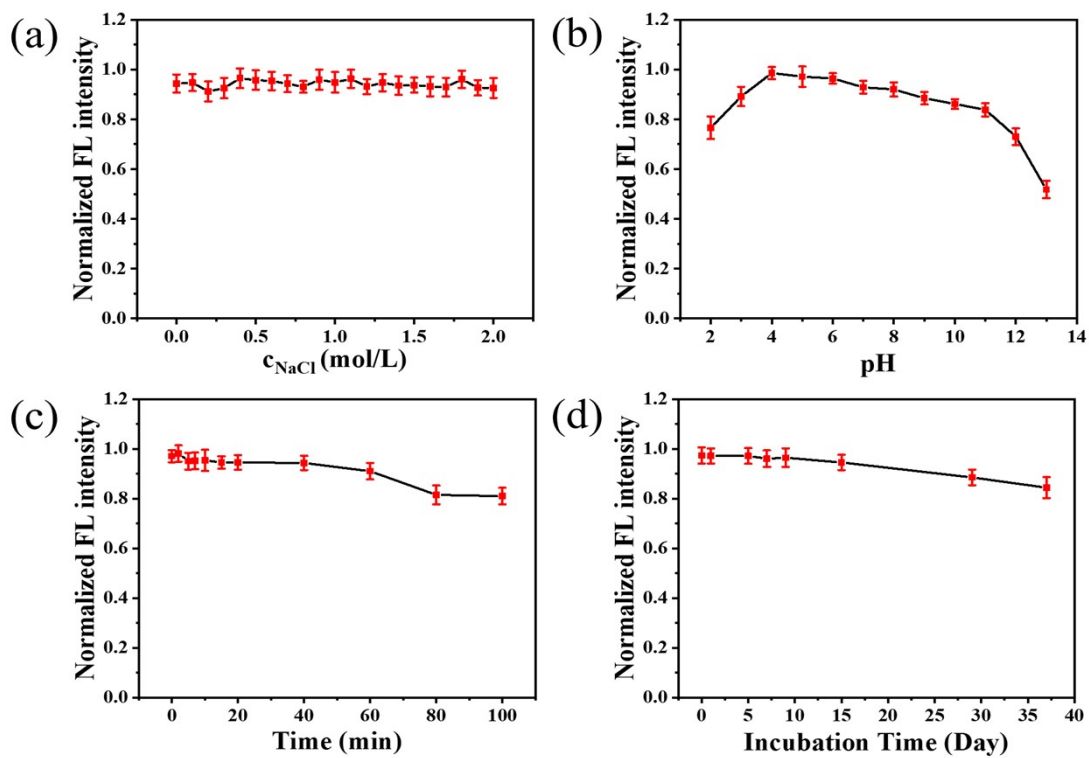

**Fig. S3** The N-CDs at (a) different concentrations of NaCl, (b) different pH values, (c) under continuous excitation at 365 nm with a UV lamp, (d) different storage time.

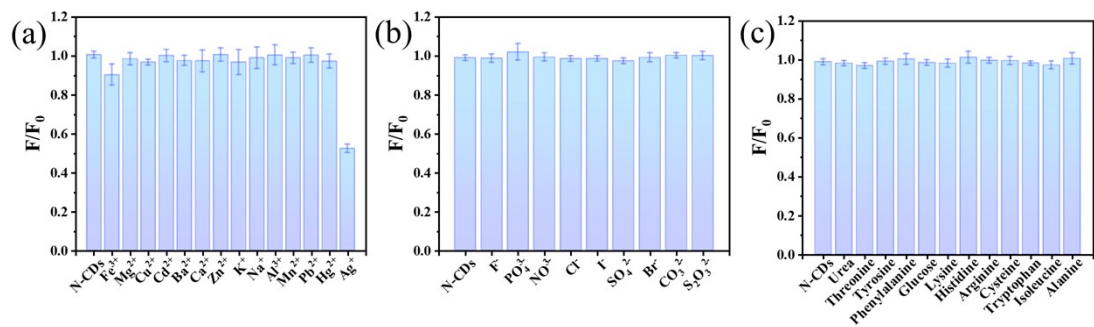

**Fig. S4** Selectivity experiments of the N-CDs probe towards cation ions (a), anions (b) and small molecules (c) (pH=7, concentration=100  $\mu$ M).

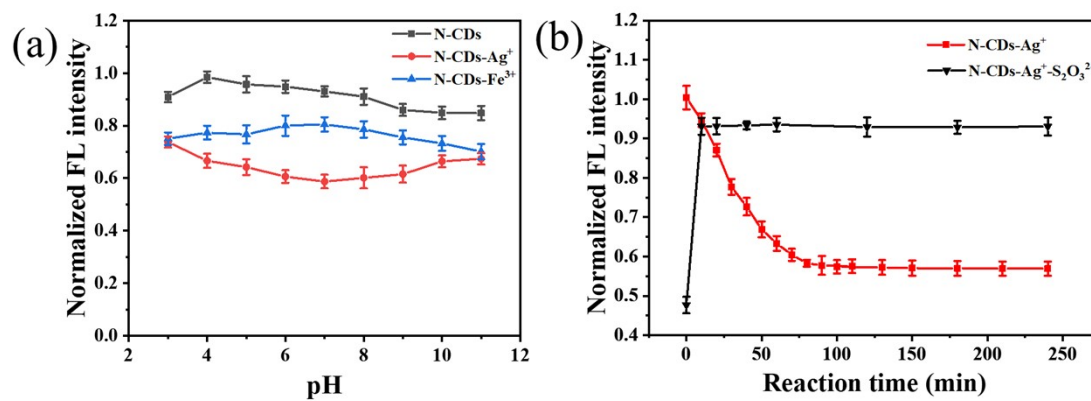

**Fig. S5** (a) Effect of pH (3–11) on the quenching efficiency of N-CDs toward 100  $\mu\text{M}$   $\text{Ag}^+$  and  $\text{Fe}^{3+}$ , (b) incubation time of the N-CDs and N-CDs- $\text{Ag}^+$  system for the detection of  $\text{Ag}^+$  and  $\text{S}_2\text{O}_3^{2-}$ .

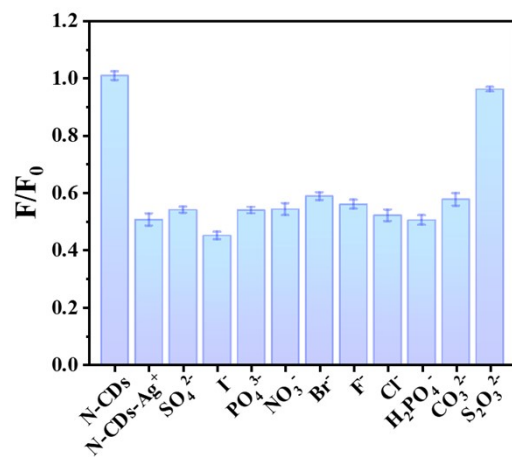

**Fig. S6** Selectivity experiments of the N-CDs-Ag<sup>+</sup> towards anions (pH=7, concentration = 100  $\mu$ M).

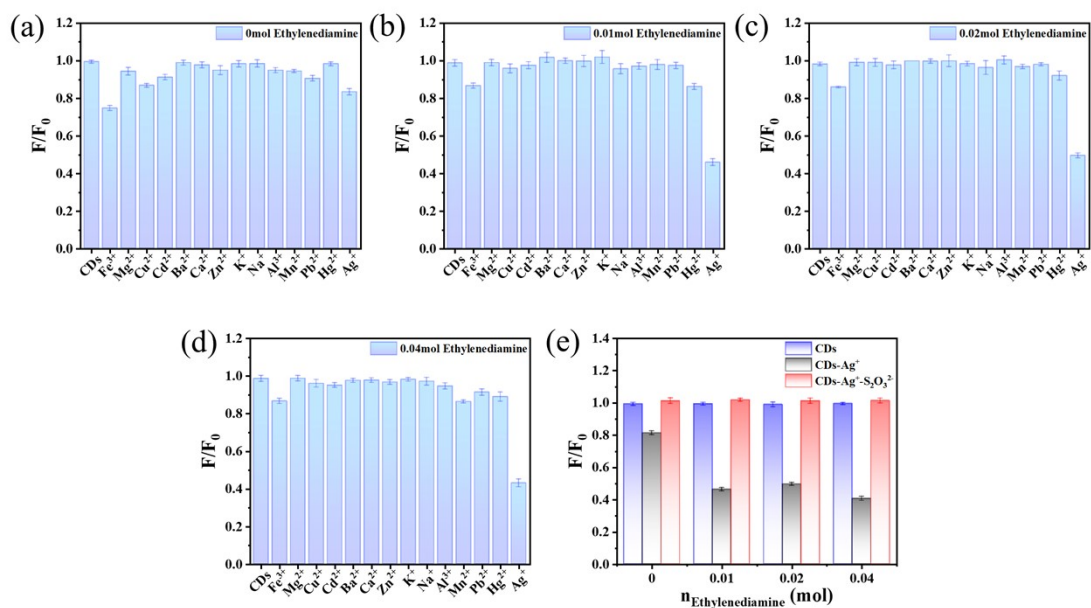

**Fig. S7** (a) 0 mol ethylenediamine, (b) 0.01 mol ethylenediamine, (c) 0.02 mol ethylenediamine, (d) 0.04 mol ethylenediamine synthesis CDs solution to cation selectivity experiment. Selectivity experiments of CDs-Ag<sup>+</sup> solutions with different nitrogen contents to anions, (pH=7, concentration = 100 μM).



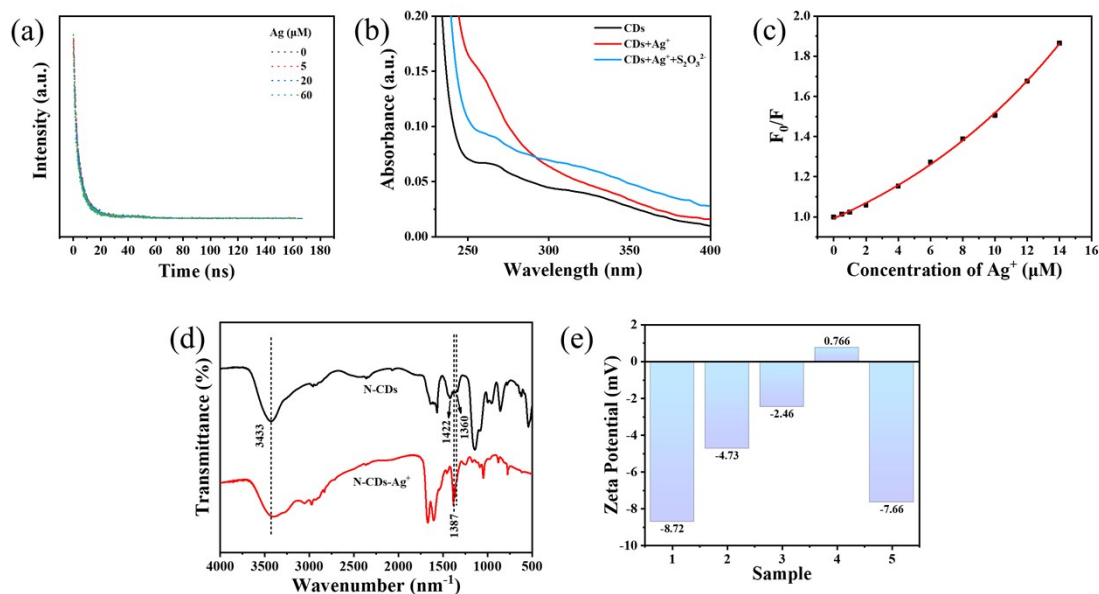

**Fig. S8** (a) The fluorescence decay curves of the N-CDs solution after the addition of 0, 5, 20, 60  $\mu\text{M}$   $\text{Ag}^+$ , (b) absorption spectrum of N-CDs and N-CDs- $\text{Ag}^+$  and N-CDs- $\text{Ag}^+$ - $\text{S}_2\text{O}_3^{2-}$ , (c) Stern-Volmer plot of the N-CDs after the addition of  $\text{Ag}^+$ . (d) FT-IR spectra of N-CDs and N-CDs added with  $\text{Ag}^+$ . (e) Zeta potential of 5 samples that the N-CDs solution of adding 0, 5, 20, 60  $\mu\text{M}$   $\text{Ag}^+$  and N-CDs solutions of 60  $\mu\text{M}$   $\text{Ag}^+$  and 60  $\mu\text{M}$   $\text{S}_2\text{O}_3^{2-}$ , respectively.

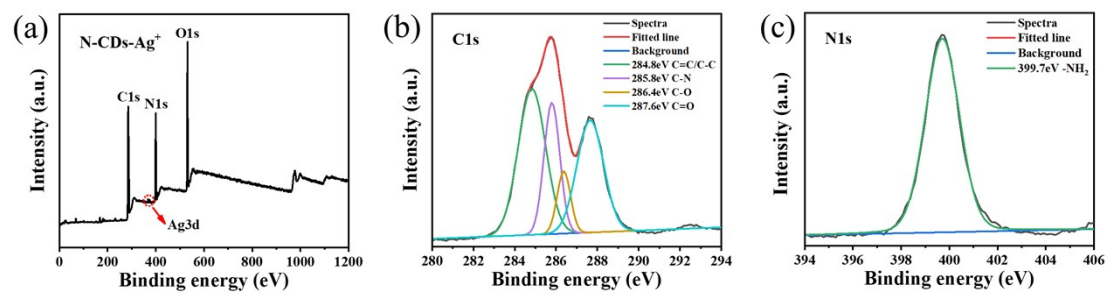

**Fig. S9** (a) Total XPS, (b) C1s and (c) N1s of XPS spectrum of N-CDs-Ag<sup>+</sup>.

---

**Table S1** Fluorescence lifetimes of N-CDs.

---

| $c_{Ag^+}$ ( $\mu$ M) | $A_1$   | $A_2$   | $A_3$  | $\tau_1$ | $\tau_2$ | $\tau_3$ | $\tau_{ave}$ (ns) |
|-----------------------|---------|---------|--------|----------|----------|----------|-------------------|
| 0                     | 388.054 | 542.317 | 41.247 | 1.104    | 4.673    | 25.136   | 9.60              |
| 5                     | 318.701 | 616.854 | 43.061 | 1.162    | 4.663    | 25.409   | 9.59              |
| 20                    | 524.257 | 462.591 | 32.555 | 2.061    | 5.514    | 28.525   | 9.38              |
| 60                    | 538.358 | 444.997 | 34.111 | 5.239    | 1.968    | 28.071   | 9.32              |

---

---

**Table S2** Detection of Ag<sup>+</sup> in real water samples.

| Real samples  | Added ( $\mu\text{M}$ ) | Found ( $\mu\text{M}$ ) | Recoveries (%) | RSD (%) (n=3) |
|---------------|-------------------------|-------------------------|----------------|---------------|
| Tap water     | 5                       | 5.16                    | 103.20         | 2.04          |
|               | 10                      | 9.92                    | 99.19          | 1.32          |
|               | 50                      | 46.95                   | 100.66         | 3.03          |
| Surface water | 5                       | 5.05                    | 100.97         | 0.77          |
|               | 10                      | 10.31                   | 103.13         | 2.13          |
|               | 50                      | 49.52                   | 99.04          | 2.50          |

---

---

**Table S3** Detection of  $S_2O_3^{2-}$  in real water samples.

---

| Real samples  | Added (nM) | Found (nM) | Recoveries (%) | RSD (%) (n=3) |
|---------------|------------|------------|----------------|---------------|
| Tap water     | 10         | 9.85       | 98.53          | 2.59          |
|               | 30         | 29.13      | 97.11          | 3.98          |
| Surface water | 10         | 9.85       | 98.46          | 3.09          |
|               | 30         | 29.95      | 99.84          | 1.38          |

---

**Table S4** Comparison of different fluorescence materials for Ag<sup>+</sup> detection.

| Fluorescent material      | Synthetic method                      | Quantum yield (%) | Linear range           | LOD           | Recovery (%) | RSD (%)   | Ref.      |
|---------------------------|---------------------------------------|-------------------|------------------------|---------------|--------------|-----------|-----------|
| Bio-dots                  | Hydrothermal carbonization            | Not given         | 0-10 $\mu$ M           | 310 nM        | 87-100       | 0.8-3.3   | 1         |
| CMC/SA/CDs                | Hydrothermal and stirring method      | 4.17              | 50-500 $\mu$ M         | 29.18 $\mu$ M | 95.1-98.6    | 0.84-2.15 | 2         |
| N-H-CDs                   | Hydrothermal method                   | 23.45             | 0-2.5, 2.5-100 $\mu$ M | 21 nM         | 98.30-108.75 | 0.45-1.32 | 3         |
| B, N-CDs/MnO <sub>2</sub> | Hydrothermal and stirring method      | 18                | 0.81-70.0 $\mu$ M      | 240 nM        | 98.70-102.25 | 1.65-4.01 | 4         |
| CSM-dots                  | Ultrasonic method and stirring method | Not given         | 5-290 $\mu$ M          | 500 nM        | 90.7-106.3   | 2.3-4.5   | 5         |
| UCDs                      | pyrolysis                             | 52.06             | 0.1-2 $\mu$ M          | 39 nM         | 98.7-105.5   | 1.4-2.2   | 6         |
| G-CDs                     | Microwave method                      | 10.4              | 0-80 $\mu$ M           | 90 nM         | 95.8-105.9   | 1.2-4.4   | 7         |
| Carbon dots               | One-step pyrolysis method             | 33                | 0-6 $\mu$ M            | 280 nM        | 92.39-109.46 | 0.34-0.92 | 8         |
| N-CDs                     | Hydrothermal method                   | 26.01             | 0-14, 14-80 $\mu$ M    | 150 nM        | 99.04-103.20 | 0.77-3.03 | this work |

---

**Table S5** Comparison of different analytical methods for detection of  $S_2O_3^{2-}$ .

| Method                    | Comment                  | Real sample | Linear range      | LOD            | Recovery (%) | RSD (%)   | Ref.      |
|---------------------------|--------------------------|-------------|-------------------|----------------|--------------|-----------|-----------|
| Fluorescence/Colorimetric | Cu <sup>2+</sup> -p-CPIP | Milk        | 0-6 $\mu$ M       | 0.442 $\mu$ M  | 97.5-105     | 0.82-2.2  | 9         |
| Electrochemical           | 2,4-DDMA-<br>NiO/NP/CPE  | Water       | 0.05-400 $\mu$ M  | 10 nM          | Not given    | Not given | 10        |
| UV-Vis spectrophotometry  | VA-CPE                   | Water       | 0.2-120 $\mu$ g/L | 0.05 $\mu$ g/L | 97-104       | 1.1-3.3   | 11        |
| Fluorescence              | C-dots/Fe <sup>3+</sup>  | No          | 0-1.25 mM         | 8.47 $\mu$ M   | Not given    | Not given | 12        |
| Fluorescence              | N-CDs                    | Water       | 0-50nM            | 1.5 nM         | 97.11-99.84  | 1.38-3.98 | this work |

---

---

## References

1. T. Song, X. Zhu, S. Zhou, G. Yang, W. Gan and Q. Yuan, *Appl. Surf. Sci.*, 2015, **347**, 505-513.
2. A. H. da Silva, D. L. P. Macuvelle, H. G. Riella, C. Soares and N. Padoin, *J. Environ. Chem. Eng.*, 2021, **9**, 105728.
3. X. Jiang, J. Huang, T. Chen, Q. Zhao, F. Xu and X. Zhang, *Int. J. Biol. Macromol.*, 2020, **153**, 412-420.
4. J. Zhang, H. Yang, S. Pan, H. Liu and X. L. Hu, *Spectrochim. Acta A Mol. Biomol. Spectrosc.*, 2021, **244**, 118831.
5. X. Zhou, Y. F. Cao, X. J. Zhou, L. N. Xu, D. H. Zhang, C. P. Wang, F. X. Chu and T. Qian, *Nanomaterials*, 2021, **11**, 2687.
6. J. Qin, L. M. Zhang and R. Yang, *Spectrochim. Acta A Mol. Biomol. Spectrosc.*, 2019, **207**, 54-60.
7. Q. Li, Z. L. Bai, X. J. Xi, Z. W. Guo, C. Liu, X. R. Liu, X. Y. Zhao, Z. Y. Li, Y. Cheng and Y. Wei, *Spectrochim. Acta A Mol. Biomol. Spectrosc.*, 2021, **248**, 119208.
8. M. I. S. Dela Cruz, N. Thongsai, M. D. G. de Luna, I. In and P. Paoprasert, *Colloids Surf. A Physicochem. Eng. Asp.*, 2019, **568**, 184-194.
9. Q. M. Wang, H. F. Sun, W. L. Sha, J. Chen, L. Y. Gu, D. Wang and X. H. Tang, *Biometals*, 2017, **30**, 441-447.
10. Z. Keivani, M. Shabani-Nooshabadi and H. Karimi-Maleh, *J. Colloid Interface Sci.*, 2017, **507**, 11-17.
11. R. Gurkan, N. Altunay and N. Gurkan, *J. Iran. Chem. Soc.*, 2017, **14**, 1033-1049.
12. N. Dhenadhayalan and K. C. Lin, *Sci. Rep.*, 2015, **5**, 10012.
